# Supplementary material
Source: publisher figshare collection journal article supplement (https://tandf.figshare.com/articles/dataset/_/12164274)
Supplement: Supplementary file 1 [file 1]

Archive with 6 entries (6 files):
- tbbb_a_1756735_sm1897.docx
- tbbb_a_1756735_sm1896.docx
- tbbb_a_1756735_sm1895.docx
- tbbb_a_1756735_sm1894.docx
- tbbb_a_1756735_sm1893.pdf
- tbbb_a_1756735_sm1892.pdf
