# Supplementary material
Source: publisher figshare collection journal article supplement (https://tandf.figshare.com/articles/dataset/_/12164274)
Supplement: Supplementary file 1 [file 1 › tbbb_a_1756735_sm1893.pdf]

**Supplementary Figure 2: Multiple sequence alignment of VDCP with other vWA domain-containing SMPs.**
