# Supplementary material
Source: publisher figshare collection journal article supplement (https://tandf.figshare.com/articles/dataset/_/12164274)
Supplement: Supplementary file 1 [file 1 › tbbb_a_1756735_sm1894.docx]

**Supplementary Table 1: BLAST results of VDCP in NCBI nr database**

| Protein name [species] | Max score | Total score | Query cover | E-value | Identity | Accession |
| --- | --- | --- | --- | --- | --- | --- |
| procollagen, type XIV, alpha 1 [Mus musculus] | 374 | 570 | 92% | 1.00E-115 | 27.91% | EDL29273.1 |
| collagen alpha-1(XII) chain-like isoform X1 [Oreochromis aureus] | 357 | 543 | 91% | 5.00E-115 | 26.39% | XP_031607448.1 |
| collagen alpha-1(XII) chain isoform X2 [Oreochromis niloticus] | 355 | 540 | 91% | 2.00E-114 | 26.39% | XP_025754763.1 |
| procollagen, type XIV, alpha 1 (predicted), isoform CRA_b [Rattus norvegicus] | 370 | 565 | 92% | 7.00E-114 | 28.37% | EDM16251.1 |
| collagen alpha-1(XII) chain isoform X1 [Oreochromis niloticus] | 353 | 537 | 90% | 1.00E-113 | 26.39% | XP_019201670.1 |
| collagen alpha-1(XII) chain [Maylandia zebra] | 353 | 536 | 90% | 2.00E-113 | 26.88% | XP_004561110.1 |
| PREDICTED: collagen alpha-1(XII) chain-like [Neolamprologus brichardi] | 352 | 534 | 90% | 2.00E-113 | 27.12% | XP_006793544.1 |
| collagen alpha-1(XII) chain-like isoform X2 [Oreochromis aureus] | 352 | 535 | 90% | 3.00E-113 | 26.39% | XP_031607449.1 |
| PREDICTED: matrilin 1 [Xenopus laevis] | 346 | 346 | 92% | 2.00E-111 | 26.40% | XP_018100267.1 |
| matrilin 1 [Xenopus laevis] | 345 | 345 | 92% | 7.00E-111 | 26.40% | NP_001079801.1 |
| collagen alpha-4(VI) chain-like [Amphiprion ocellaris] | 343 | 534 | 89% | 8.00E-111 | 30.10% | XP_023137683.1 |
| cartilage matrix protein [Pangasianodon hypophthalmus] | 343 | 343 | 95% | 3.00E-110 | 26.46% | XP_026785686.1 |
| cartilage matrix protein [Pelodiscus sinensis] | 343 | 343 | 98% | 3.00E-110 | 26.48% | XP_006134615.1 |
| PREDICTED: cartilage matrix protein-like [Xenopus laevis] | 342 | 342 | 92% | 5.00E-110 | 26.17% | XP_018104071.1 |
| PREDICTED: cartilage matrix protein isoform X1 [Xenopus tropicalis] | 342 | 506 | 91% | 1.00E-109 | 26.70% | XP_017946786.1 |
| matrilin 4 [Columba livia] | 342 | 516 | 93% | 1.00E-109 | 26.28% | PKK23754.1 |
| cartilage matrix protein precursor [Xenopus tropicalis] | 342 | 506 | 91% | 2.00E-109 | 26.70% | NP_001025613.1 |
| PREDICTED: LOW QUALITY PROTEIN: matrilin-4 [Mesitornis unicolor] | 342 | 342 | 93% | 2.00E-109 | 26.28% | XP_010191286.1 |
| PREDICTED: LOW QUALITY PROTEIN: matrilin-4 [Picoides pubescens] | 342 | 342 | 93% | 2.00E-109 | 25.84% | XP_009906939.1 |
| PREDICTED: matrilin-4 [Charadrius vociferus] | 341 | 516 | 93% | 4.00E-109 | 26.06% | XP_009881853.1 |
| PREDICTED: matrilin-4 [Cariama cristata] | 341 | 696 | 94% | 4.00E-109 | 25.78% | XP_009707410.1 |
| PREDICTED: matrilin-4 [Egretta garzetta] | 340 | 517 | 93% | 1.00E-108 | 26.06% | XP_009635632.1 |
| cartilage matrix -like protein [Labeo rohita] | 350 | 350 | 95% | 2.00E-108 | 25.39% | RXN26263.1 |
| Collagen alpha-4(VI) chain [Mizuhopecten yessoensis] | 363 | 1055 | 92% | 2.00E-108 | 31.70% | OWF45097.1 |
| PREDICTED: matrilin-4 [Haliaeetus albicilla] | 339 | 511 | 93% | 3.00E-108 | 26.06% | XP_009925786.1 |
| PREDICTED: matrilin-4 [Pterocles gutturalis] | 339 | 514 | 93% | 3.00E-108 | 26.33% | XP_010072765.1 |
| matrilin-4 isoform X3 [Enhydra lutris kenyoni] | 339 | 339 | 93% | 3.00E-108 | 27.37% | XP_022349669.1 |
| PREDICTED: cartilage matrix protein [Latimeria chalumnae] | 338 | 338 | 91% | 4.00E-108 | 26.47% | XP_005993210.1 |
| cartilage matrix protein [Tupaia chinensis] | 340 | 340 | 95% | 5.00E-108 | 25.32% | XP_027622984.1 |
| matrilin-4 isoform X2 [Octodon degus] | 338 | 516 | 94% | 1.00E-107 | 27.31% | XP_023570603.1 |
| cartilage matrix protein [Pygocentrus nattereri] | 337 | 337 | 95% | 1.00E-107 | 26.92% | XP_017551449.1 |
| collagen alpha-1(XIV) chain-like isoform X2 [Crassostrea gigas] | 334 | 334 | 91% | 1.00E-107 | 40.53% | XP_011425717.1 |
| cartilage matrix protein-like [Scleropages formosus] | 341 | 341 | 91% | 1.00E-107 | 24.83% | KPP56712.1 |
| cartilage matrix protein [Taeniopygia guttata] | 338 | 338 | 93% | 2.00E-107 | 26.49% | XP_030146106.1 |
| PREDICTED: collagen alpha-6(VI) chain [Austrofundulus limnaeus] | 361 | 2376 | 99% | 2.00E-107 | 30.22% | XP_013884856.1 |
| collagen alpha-1(XIV) chain-like isoform X1 [Crassostrea gigas] | 333 | 333 | 91% | 2.00E-107 | 40.29% | XP_019922310.1 |
| cartilage matrix protein [Rhinatrema bivittatum] | 337 | 337 | 90% | 4.00E-107 | 26.38% | XP_029474940.1 |
| PREDICTED: matrilin-4 isoform X5 [Cercocebus atys] | 336 | 336 | 93% | 4.00E-107 | 26.43% | XP_011921197.1 |
| cartilage matrix protein [Chanos chanos] | 336 | 336 | 96% | 4.00E-107 | 25.00% | XP_030644419.1 |
| PREDICTED: matrilin-4 isoform X3 [Ochotona princeps] | 335 | 335 | 93% | 7.00E-107 | 27.09% | XP_004585902.1 |
