# Supplementary material
Source: publisher figshare collection journal article supplement (https://tandf.figshare.com/articles/dataset/_/12164274)
Supplement: Supplementary file 1 [file 1 › tbbb_a_1756735_sm1895.docx]

**Supplementary Table 2: Amino acid composition (mole percent) of VDCP**

| Amino acid |  | Mole percent |
| --- | --- | --- |
| Val (V) |  | 9.1% |
| Leu (L) |  | 8.8% |
| Thr (T) |  | 7.3% |
| Ala (A) |  | 7.1% |
| Asp (D) |  | 6.6% |
| Ser (S) |  | 6.6% |
| Gly (G) |  | 6.4% |
| Arg (R) |  | 6.0% |
| Ile (I) |  | 5.7% |
| Lys (K) |  | 5.7% |
| Asn (N) |  | 5.3% |
| Phe (F) |  | 5.3% |
| Glu (E) |  | 5.1% |
| Pro (P) |  | 4.6% |
| Gln (Q) |  | 3.8% |
| Tyr (Y) |  | 2.2% |
| His (H) |  | 1.8% |
| Met (M) |  | 1.5% |
| Cys (C) |  | 0.9% |
| Trp (W) |  | 0.2% |
| Pyl (O) |  | 0.0% |
| Sec (U) |  | 0.0% |
