# Supplementary material
Source: publisher figshare collection journal article supplement (https://tandf.figshare.com/articles/dataset/_/12164274)
Supplement: Supplementary file 1 [file 1 › tbbb_a_1756735_sm1896.docx]

**Supplementary Table 3: 89 proteins (with FDR<0.01) identified from rVDCP pull-down assay.**

| **No.** | **Fasta headers** | **Unique peptides** | **Sequence coverage [%]** | **Mol. weight [kDa]** | **Sequence length** | **Score** | **Intensity** |
| --- | --- | --- | --- | --- | --- | --- | --- |
| 1 | CL4409.Contig1_mantle 804 1436 minus strand collagen-like protein 2 [Mytilus coruscus] | 12 | 82.5 | 23.44 | 211 | 323.31 | 3.51E+11 |
| 2 | CL7857.Contig1_mantle 204 746 RecName: Full=Mytilin-1; AltName: Full=Mytilus uncharacterized protein 1; Short=MUSP-1; Flags: Precursor | 9 | 57.5 | 19.9 | 181 | 323.31 | 1.06E+11 |
| 3 | CL1310.Contig2_mantle 120 1286 minus strand PREDICTED: LIM domain-binding protein 3-like [Oryzias latipes] | 8 | 21.9 | 44.205 | 389 | 118.68 | 1.69E+10 |
| 4 | Unigene12026_mantle 129 1256 RecName: Full=Actin, cytoplasmic; Flags: Precursor >gi|14575741|gb|AAK68711.1|AF329437_1 actin [Biomphalaria alexandrina] | 2 | 21.5 | 41.87 | 376 | 56.645 | 3.91E+09 |
| 5 | Unigene68573_mantle 117 539 Whirlin [Crassostrea gigas] | 7 | 46.8 | 15.931 | 141 | 49.539 | 2.22E+09 |
| 6 | CL5847.Contig1_mantle 16 1071 minus strand SD-rich protein-1 [Mytilus coruscus] > AKS48139.1 | 6 | 19.6 | 37.537 | 352 | 60.584 | 1.73E+09 |
| 7 | CL228.Contig1_mantle 89 1420 PREDICTED: tubulin beta chain-like [Hydra magnipapillata] | 4 | 11.5 | 49.821 | 444 | 41.254 | 1.03E+09 |
| 8 | Unigene32537_mantle 190 2355 minus strand heat shock protein 90 [Mytilus galloprovincialis] >gi|205362632|emb|CAE52893.2| heat shock protein 90 [Mytilus galloprovincialis] | 4 | 7.1 | 83.214 | 722 | 40.419 | 8.08E+08 |
| 9 | Unigene60640_mantle 121 627 minus strand RecName: Full=Mytilin-3; AltName: Full=Mytilus uncharacterized protein 3; Short=MUSP-3; Flags: Precursor | 4 | 29.6 | 18.13 | 169 | 48.831 | 6.88E+09 |
| 10 | CL28.Contig6_mantle 97 1446 alpha tubulin [Schistosoma mansoni] >gi|161072|gb|AAA29918.1| alpha tubulin [Schistosoma mansoni] >gi|56758676|gb|AAW27478.1| SJCHGC00301 protein [Schistosoma japonicum] | 3 | 11.6 | 49.979 | 450 | 101.43 | 1.54E+09 |
| 11 | Unigene66002_mantle 99 329 ubiquitin C variant [Homo sapiens];Unigene69728_mantle 16 399 Ubiquitin [Crassostrea gigas];Unigene50906_mantle 52 513 ubiquitin/ribosomal protein S27 precursor [Crassostrea gigas] | 3 | 44.2 | 8.6959 | 77 | 34.315 | 1.46E+09 |
| 12 | CL3743.Contig1_mantle 64 1446 minus strand elongation factor 1 alpha [Mytilus galloprovincialis] | 2 | 5 | 50.456 | 461 | 12.865 | 1.79E+08 |
| 13 | CL700.Contig2_mantle 82 540 minus strand Metalloproteinase inhibitor 3 [Crassostrea gigas] | 2 | 11.8 | 17.722 | 153 | 11.546 | 6.65E+08 |
| 14 | CL7444.Contig2_mantle 136 675 minus strand Transgelin-2 [Crassostrea gigas];CL7444.Contig1_mantle 193 675 minus strand Transgelin-2 [Crassostrea gigas] | 2 | 28.9 | 20.42 | 180 | 25.244 | 9.99E+08 |
| 15 | CL8938.Contig2_mantle 2 1000 PREDICTED: actin, cytoplasmic 2 [Trichechus manatus latirostris];CL8938.Contig6_mantle 2 868 minus strand Actin-2 [Crassostrea gigas];CL8938.Contig5_mantle 2 868 minus strand Actin-2 [Crassostrea gigas];CL8938.Contig | 2 | 30.3 | 37.44 | 333 | 13.294 | 9.88E+08 |
| 16 | CL1098.Contig2_mantle 567 1502 Interferon-induced helicase C domain-containing protein 1 [Crassostrea gigas] | 1 | 3.8 | 36.438 | 312 | -2 | 7.95E+07 |
| 17 | CL1129.Contig1_mantle 35 1057 malate dehydrogenase precursor [Nucella lapillus] | 1 | 3.5 | 35.922 | 341 | 9.2472 | 2.26E+08 |
| 18 | CL1197.Contig4_mantle 871 5988 minus strand pedal retractor muscle myosin heavy chain [Mytilus galloprovincialis] | 1 | 0.6 | 196.72 | 1706 | 6.0581 | 1.03E+09 |
| 19 | CL1249.Contig3_mantle 201 1232 Transcriptional repressor p66-alpha [Crassostrea gigas] | 1 | 3.2 | 38.526 | 344 | 6.0415 | 7.80E+07 |
| 20 | CL2008.Contig1_mantle 133 1221 minus strand Fructose-bisphosphate aldolase [Crassostrea gigas] | 1 | 3.9 | 39.202 | 363 | 8.0707 | 1.23E+08 |
| 21 | CL7976.Contig1_mantle 212 418 Heterogeneous nuclear ribonucleoprotein K [Crassostrea gigas] | 1 | 20.3 | 7.5813 | 69 | 5.7811 | 0.00E+00 |
| 22 | CL213.Contig2_mantle 1226 2977 minus strand hypothetical protein CGI_10011233 [Crassostrea gigas] | 1 | 3.1 | 66.182 | 584 | 5.8963 | 0.00E+00 |
| 23 | Unigene28639_mantle 88 300 minus strand hypothetical protein CAPTEDRAFT_6646 [Capitella teleta] | 1 | 15.5 | 8.0011 | 71 | 5.8331 | 8.91E+07 |
| 24 | CL3187.Contig2_mantle 213 755 hypothetical protein CGI_10011960 [Crassostrea gigas];CL3187.Contig1_mantle 184 726 hypothetical protein CGI_10011960 [Crassostrea gigas] | 1 | 7.7 | 21.205 | 181 | 5.7289 | 9.62E+07 |
| 25 | CL3579.Contig2_mantle 214 678 RecName: Full=Calmodulin; Short=CaM >gi|20152219|dbj|BAB89359.1| calmodulin [Strongylocentrotus intermedius] >gi|20152223|dbj|BAB89361.1| calmodulin [Strongylocentrotus intermedius];CL3579.Contig1_mantle 216 680 RecName: | 1 | 5.8 | 17.361 | 155 | 6.2238 | 6.07E+07 |
| 26 | CL439.Contig2_mantle 100 3567 minus strand QN1-like protein [Crassostrea gigas];CL439.Contig3_mantle 100 3588 minus strand QN1-like protein [Crassostrea gigas] | 1 | 1 | 132.15 | 1156 | 6.2268 | 0.00E+00 |
| 27 | CL4530.Contig1_mantle 2 259 Atrial natriuretic peptide clearance receptor [Crassostrea gigas] | 1 | 12.8 | 9.7313 | 86 | 5.8417 | 2.33E+09 |
| 28 | Unigene53823_mantle 261 413 minus strand calmodulin [Hyriopsis cumingii] | 1 | 33.3 | 5.6101 | 51 | 14.553 | 1.28E+08 |
| 29 | CL5513.Contig2_mantle 267 719 minus strand hypothetical protein CAPTEDRAFT_112968, partial [Capitella teleta];CL5513.Contig1_mantle 237 689 minus strand hypothetical protein CAPTEDRAFT_112968, partial [Capitella teleta] | 1 | 6.6 | 16.945 | 151 | 5.7279 | 2.61E+07 |
| 30 | CL6571.Contig2_mantle 25 615 ribosomal protein L19 [Crassostrea gigas] | 1 | 8.6 | 23.268 | 197 | 9.7894 | 6.03E+07 |
| 31 | CL7857.Contig3_mantle 204 740 RecName: Full=Mytilin-1; AltName: Full=Mytilus uncharacterized protein 1; Short=MUSP-1; Flags: Precursor | 1 | 7.3 | 19.882 | 179 | 20.337 | 1.16E+10 |
| 32 | Unigene69137_mantle 2 751 minus strand heat shock protein 70 [Mytilus galloprovincialis] | 1 | 6.4 | 27.4 | 250 | 13.797 | 4.50E+08 |
| 33 | CL8670.Contig1_mantle 52 432 minus strand histone variant H2A.Z [Mytilus galloprovincialis];Unigene60721_mantle 178 579 minus strand histone variant H2A.X [Mytilus galloprovincialis] | 1 | 7.1 | 13.409 | 127 | 7.2817 | 2.95E+08 |
| 34 | CL891.Contig2_mantle 162 1883 hypothetical protein CAPTEDRAFT_158045 [Capitella teleta] | 1 | 2.3 | 65.444 | 574 | 5.9736 | 0.00E+00 |
| 35 | Unigene1188_mantle 1995 5501 minus strand erythrocyte membrane-associated giant protein antigen 332 [Plasmodium yoelii yoelii 17XNL] >gi|23491364|gb|EAA22916.1| erythrocyte membrane-associated giant protein antigen 332 [Plasmodium yoelii yoelii] | 1 | 1 | 131.87 | 1169 | 5.822 | 1.55E+08 |
| 36 | Unigene12030_mantle 99 1049 minus strand Receptor of Activated Kinase C 1 [Mya arenaria] | 1 | 8.5 | 35.016 | 317 | 23.952 | 3.11E+08 |
| 37 | Unigene13723_mantle 58 1059 minus strand Glyceraldehyde-3-phosphate dehydrogenase [Crassostrea gigas] | 1 | 3.3 | 35.867 | 334 | 6.3245 | 2.20E+08 |
| 38 | Unigene14197_mantle 2 865 minus strand hypothetical protein CGI_10013877 [Crassostrea gigas] | 1 | 2.8 | 31.754 | 288 | 5.8402 | 9.62E+08 |
| 39 | Unigene14715_mantle 2 799 ATP-dependent RNA helicase DHX8 [Crassostrea gigas] | 1 | 3.8 | 31.096 | 266 | -2 | 2.51E+08 |
| 40 | Unigene16643_mantle 8 154 PREDICTED: dimethylaniline monooxygenase [N-oxide-forming] 5-like [Anolis carolinensis] | 1 | 16.3 | 5.7885 | 49 | -2 | 4.52E+07 |
| 41 | Unigene16669_mantle 194 1732 minus strand MOG interacting and ectopic P-granules protein 1 [Crassostrea gigas] | 1 | 2.3 | 58.362 | 513 | 6.6839 | 1.01E+09 |
| 42 | Unigene21317_mantle 11 376 hypothetical protein CGI_10019608 [Crassostrea gigas] | 1 | 4.9 | 13.574 | 122 | 6.583 | 4.89E+10 |
| 43 | Unigene2216_mantle 153 1652 hypothetical protein CGI_10022667 [Crassostrea gigas] | 1 | 2.4 | 59.833 | 500 | 6.1072 | 4.36E+08 |
| 44 | Unigene22661_mantle 263 1435 minus strand Leucine-rich repeat flightless-interacting protein 2 [Crassostrea gigas] | 1 | 2.8 | 45.602 | 391 | 5.7526 | 3.88E+08 |
| 45 | Unigene24682_mantle 2 2470 Serine/threonine-protein kinase phg2 [Crassostrea gigas] | 1 | 1.8 | 95.05 | 823 | 5.7481 | 9.06E+07 |
| 46 | Unigene25846_mantle 103 1221 minus strand hypothetical protein CGI_10002332 [Crassostrea gigas] | 1 | 6.4 | 43.527 | 373 | 6.2025 | 2.13E+08 |
| 47 | Unigene27660_mantle 66 551 RecName: Full=Mytilin-1; AltName: Full=Mytilus uncharacterized protein 1; Short=MUSP-1; Flags: Precursor | 1 | 8 | 17.943 | 162 | 6.0118 | 0.00E+00 |
| 48 | Unigene32884_mantle 14 271 Regulator of G-protein signaling 22 [Crassostrea gigas] | 1 | 12.8 | 9.864 | 86 | 6.2257 | 6.33E+08 |
| 49 | Unigene36906_mantle 3 722 hypothetical protein CGI_10028829 [Crassostrea gigas] | 1 | 6.2 | 27.239 | 240 | 5.9188 | 0.00E+00 |
| 50 | Unigene37493_mantle 2 991 Dynein heavy chain 7, axonemal [Crassostrea gigas] | 1 | 3.9 | 37.613 | 330 | 5.7231 | 7.96E+07 |
| 51 | Unigene38407_mantle 3 185 minus strand PREDICTED: metalloendopeptidase OMA1, mitochondrial isoform 2 [Saimiri boliviensis boliviensis] | 1 | 14.8 | 7.5007 | 61 | 5.7264 | 1.01E+09 |
| 52 | Unigene39998_mantle 41 733 minus strand Protein toll [Crassostrea gigas] | 1 | 6.9 | 26.465 | 231 | 5.8634 | 1.29E+08 |
| 53 | Unigene40645_mantle 3 2333 minus strand Rho/Cdc42/Rac GTPase-activating protein RICS [Crassostrea gigas] | 1 | 2.3 | 87.393 | 777 | 6.3992 | 1.14E+08 |
| 54 | Unigene40661_mantle 1 1923 PHD finger protein 10 [Crassostrea gigas] | 1 | 1.6 | 72.115 | 641 | 5.8287 | 0.00E+00 |
| 55 | Unigene41906_mantle 92 1336 minus strand Phosphoglycerate kinase 1 [Crassostrea gigas] | 1 | 3.6 | 43.705 | 415 | 6.5291 | 9.27E+07 |
| 56 | Unigene42602_mantle 20 736 minus strand Rpls3-b protein [Xenopus laevis] >gi|213626632|gb|AAI69756.1| Rpls3-b protein [Xenopus laevis] >gi|213627669|gb|AAI69758.1| Rpls3-b protein [Xenopus laevis] | 1 | 5.4 | 26.426 | 239 | 11.786 | 0.00E+00 |
| 57 | Unigene42772_mantle 159 977 hypothetical protein CGI_10002954 [Crassostrea gigas] | 1 | 3.7 | 30.539 | 273 | 5.8257 | 0.00E+00 |
| 58 | Unigene44357_mantle 34 480 ribosomal protein S15 [Ostrea edulis] | 1 | 8.7 | 17.214 | 149 | 7.1667 | 3.42E+08 |
| 59 | Unigene45465_mantle 1 264 minus strand PREDICTED: N-acetylgalactosamine-6-sulfatase-like [Strongylocentrotus purpuratus] | 1 | 13.6 | 10.129 | 88 | 5.9683 | 2.27E+08 |
| 60 | Unigene45541_mantle 39 1076 Phosphate carrier protein, mitochondrial [Crassostrea gigas] | 1 | 3.5 | 38.675 | 346 | 5.8415 | 8.45E+07 |
| 61 | Unigene46016_mantle 26 334 minus strand Phosphatidylinositol-glycan biosynthesis class X protein [Crassostrea gigas] | 1 | 19.4 | 12.234 | 103 | 5.8823 | 1.63E+08 |
| 62 | Unigene47920_mantle 22 378 minus strand PREDICTED: vitelline membrane outer layer protein 1 homolog [Felis catus] | 1 | 8.4 | 13.111 | 119 | 5.812 | 1.39E+08 |
| 63 | Unigene49804_mantle 146 1246 minus strand EF-hand domain-containing protein C3orf25-like protein [Crassostrea gigas] | 1 | 2.7 | 42.683 | 367 | 5.8538 | 4.35E+09 |
| 64 | Unigene55440_mantle 14 1276 Sodium/potassium-transporting ATPase subunit alpha [Crassostrea gigas] | 1 | 3.6 | 46.171 | 421 | 6.8339 | 7.20E+07 |
| 65 | Unigene55674_mantle 1 1131 Protein timeless [Crassostrea gigas] | 1 | 7.7 | 43.755 | 377 | 5.9773 | 1.58E+08 |
| 66 | Unigene56236_mantle 1 1116 minus strand hypothetical protein CGI_10015322 [Crassostrea gigas] | 1 | 3 | 43.381 | 372 | 5.9519 | 0.00E+00 |
| 67 | Unigene56282_mantle 138 1859 heat shock protein 60 [Biomphalaria glabrata] | 1 | 4.4 | 61.47 | 574 | 16.696 | 1.19E+08 |
| 68 | Unigene56299_mantle 171 2084 astacin-like protein [Pinctada fucata] | 1 | 1.9 | 72.337 | 638 | 5.7243 | 5.95E+07 |
| 69 | Unigene56340_mantle 346 2247 minus strand PREDICTED: similar to GA17483-PA [Tribolium castaneum] >gi|270009883|gb|EFA06331.1| hypothetical protein TcasGA2_TC009202 [Tribolium castaneum] | 1 | 1.3 | 70.629 | 634 | 5.7334 | 4.67E+07 |
| 70 | Unigene56393_mantle 176 1531 Deformed epidermal autoregulatory factor 1-like protein [Crassostrea gigas] | 1 | 2.4 | 49.862 | 452 | 5.8154 | 1.40E+10 |
| 71 | Unigene69762_mantle 110 517 minus strand Chain A, The Human Nucleosome Structure Containing The Histone Variant H3.3 >gi|334359129|pdb|3AV2|E Chain E, The Human Nucleosome Structure Containing The Histone Variant H3.3;Unigene57076_mantle 66 725 minu | 1 | 6.6 | 15.328 | 136 | 6.031 | 2.58E+08 |
| 72 | Unigene58622_mantle 1 531 minus strand Replication factor C subunit 3 [Crassostrea gigas] | 1 | 6.2 | 20.483 | 177 | 5.7218 | 3.54E+07 |
| 73 | Unigene59967_mantle 1990 4392 minus strand hypothetical protein TcasGA2_TC008139 [Tribolium castaneum] | 1 | 1.6 | 89.862 | 801 | 5.7465 | 0.00E+00 |
| 74 | Unigene60493_mantle 52 1362 hypothetical protein BRAFLDRAFT_281651 [Branchiostoma floridae] >gi|229282856|gb|EEN53603.1| hypothetical protein BRAFLDRAFT_281651 [Branchiostoma floridae] | 1 | 4.1 | 49.588 | 437 | 5.9727 | 0.00E+00 |
| 75 | Unigene62034_mantle 1 693 CAD protein [Crassostrea gigas] | 1 | 4.3 | 25.341 | 231 | 5.8909 | 1.27E+08 |
| 76 | Unigene62090_mantle 101 484 PREDICTED: group 10 secretory phospholipase A2 [Saimiri boliviensis boliviensis] | 1 | 10.9 | 14.536 | 128 | 7.6323 | 4.88E+07 |
| 77 | Unigene62133_mantle 2 3385 Structural maintenance of chromosomes protein 3 [Crassostrea gigas] | 1 | 1.2 | 131.11 | 1128 | 5.9123 | 4.20E+07 |
| 78 | Unigene62135_mantle 20 757 minus strand hypothetical protein DFA_01589 [Dictyostelium fasciculatum] >gi|328873336|gb|EGG21703.1| hypothetical protein DFA_01589 [Dictyostelium fasciculatum] | 1 | 4.9 | 24.6 | 246 | 9.3141 | 9.56E+07 |
| 79 | Unigene62477_mantle 2 811 minus strand Aldehyde dehydrogenase family 3 member B1 [Crassostrea gigas] | 1 | 4.1 | 30.153 | 270 | -2 | 4.96E+08 |
| 80 | Unigene64088_mantle 2 574 minus strand glucose-regulated protein 78 [Bombyx mori] | 1 | 8.9 | 20.96 | 191 | 5.8279 | 0.00E+00 |
| 81 | Unigene66132_mantle 152 1045 minus strand RecName: Full=Uncharacterized protein DDB_G0271670; Flags: Precursor | 1 | 5 | 31.635 | 298 | 5.9466 | 1.28E+08 |
| 82 | Unigene66576_mantle 136 732 minus strand glucose-regulated protein 94 [Crassostrea gigas] | 1 | 6 | 22.347 | 199 | 9.2472 | 3.21E+08 |
| 83 | Unigene67645_mantle 4 2487 hypothetical protein CGI_10017178 [Crassostrea gigas] | 1 | 1.4 | 92.339 | 828 | 5.766 | 1.10E+08 |
| 84 | Unigene67972_mantle 122 2674 minus strand Glycogen phosphorylase, muscle form [Crassostrea gigas] | 1 | 1.4 | 98.038 | 851 | 6.7688 | 6.45E+07 |
| 85 | Unigene68329_mantle 238 1176 minus strand catchin protein [Mytilus galloprovincialis];Unigene68330_mantle 2630 3634 minus strand myosin heavy chain [Mytilus galloprovincialis] | 1 | 3.8 | 34.791 | 313 | 11.406 | 0.00E+00 |
| 86 | Unigene69727_mantle 2 205 minus strand RecName: Full=Alanine and glycine-rich protein; AltName: Full=MSI60-like protein | 1 | 16.2 | 5.9279 | 68 | 6.9672 | 6.52E+08 |
| 87 | Unigene69768_mantle 99 455 minus strand small nuclear ribonucleoprotein D2-like protein [Azumapecten farreri] | 1 | 8.4 | 13.65 | 119 | 5.8362 | 0.00E+00 |
| 88 | Unigene69779_mantle 5 289 fibroin [Antheraea yamamai] | 1 | 22.1 | 7.4838 | 95 | 16.235 | 2.37E+08 |
| 89 | Unigene76582_mantle 5 217 minus strand hypothetical protein SINV_07643 [Solenopsis invicta] | 1 | 19.7 | 7.7199 | 71 | 5.8199 | 1.75E+10 |
