# Supplementary material
Source: publisher figshare collection journal article supplement (https://tandf.figshare.com/articles/dataset/_/12164274)
Supplement: Supplementary file 1 [file 1 › tbbb_a_1756735_sm1897.docx]

**Supplementary Table 4: 106 proteins (with FDR<0.01) identified from the blank control sample.**

| **No.** | **Fasta headers** | **Unique peptides** | **Sequence coverage [%]** | **Mol. weight [kDa]** | **Sequence length** | **Score** | **Intensity** |
| --- | --- | --- | --- | --- | --- | --- | --- |
| 1 | CL228.Contig1_mantle 89 1420 PREDICTED: tubulin beta chain-like [Hydra magnipapillata];CL228.Contig2_mantle 88 1419 PREDICTED: tubulin beta chain-like [Hydra magnipapillata] | 9 | 34 | 49.821 | 444 | 323.31 | 2.00E+09 |
| 2 | Unigene69762_mantle 110 517 minus strand Chain A, The Human Nucleosome Structure Containing The Histone Variant H3.3 >gi|334359129|pdb|3AV2|E Chain E, The Human Nucleosome Structure Containing The Histone Variant H3.3 | 5 | 26.5 | 15.328 | 136 | 32.542 | 6.52E+09 |
| 3 | Unigene28346_mantle 16 1581 ATP synthase beta subunit [Pinctada fucata] | 4 | 9.6 | 56.422 | 522 | 148.61 | 1.96E+08 |
| 4 | CL8938.Contig2_mantle 2 1000 PREDICTED: actin, cytoplasmic 2 [Trichechus manatus latirostris] | 4 | 41.4 | 37.44 | 333 | 109.24 | 7.03E+09 |
| 5 | CL1310.Contig2_mantle 120 1286 minus strand PREDICTED: LIM domain-binding protein 3-like [Oryzias latipes];CL1310.Contig1_mantle 120 1286 minus strand PREDICTED: LIM domain-binding protein 3-like [Oryzias latipes] | 4 | 13.1 | 44.205 | 389 | 50.201 | 5.13E+08 |
| 6 | Unigene66002_mantle 99 329 ubiquitin C variant [Homo sapiens];Unigene69728_mantle 16 399 Ubiquitin [Crassostrea gigas];Unigene50906_mantle 52 513 ubiquitin/ribosomal protein S27 precursor [Crassostrea gigas];CL1662.Contig1_mantle 2 82 minus str | 4 | 55.8 | 8.6959 | 77 | 30.949 | 6.14E+09 |
| 7 | Unigene32537_mantle 190 2355 minus strand heat shock protein 90 [Mytilus galloprovincialis] >gi|205362632|emb|CAE52893.2| heat shock protein 90 [Mytilus galloprovincialis] | 4 | 6.9 | 83.214 | 722 | 30.854 | 1.27E+09 |
| 8 | CL3743.Contig1_mantle 64 1446 minus strand elongation factor 1 alpha [Mytilus galloprovincialis] | 3 | 8.2 | 50.456 | 461 | 29.371 | 6.40E+08 |
| 9 | CL2091.Contig2_mantle 204 2096 Heat shock protein 70 B2 [Crassostrea gigas];Unigene63065_mantle 128 2089 heat shock cognate 71 [Mytilus galloprovincialis] | 2 | 5.9 | 69.392 | 631 | 31.187 | 1.04E+09 |
| 10 | Unigene11841_mantle 144 689 minus strand Peptidyl-prolyl cis-trans isomerase B [Crassostrea gigas];CL2755.Contig1_mantle 152 652 Peptidyl-prolyl cis-trans isomerase B [Cricetulus griseus] | 2 | 9.3 | 20.056 | 182 | 21.396 | 2.59E+07 |
| 11 | Unigene12011_mantle 41 469 minus strand putative 60S ribosomal protein RPL26 [Phoronis muelleri] | 2 | 6.3 | 16.779 | 143 | 21.218 | 3.16E+07 |
| 12 | Unigene72302_mantle 4 372 histone H2B [Mytilus edulis] >gi|23304761|emb|CAD37820.1| histone H2B [Mytilus edulis] >gi|33114055|gb|AAP94644.1| histone H2B [Mytilus galloprovincialis] >gi|33114088|gb|AAP94662.1| histone H2B [Mytilus trossulus] >gi|15716914 | 2 | 10.6 | 13.661 | 123 | 16.934 | 1.27E+09 |
| 13 | Unigene367_mantle 73 546 minus strand hypothetical protein; K11294 nucleolin | 2 | 19 | 17.677 | 158 | 14.802 | 1.55E+08 |
| 14 | CL3579.Contig2_mantle 214 678 RecName: Full=Calmodulin; Short=CaM >gi|20152219|dbj|BAB89359.1| calmodulin [Strongylocentrotus intermedius] >gi|20152223|dbj|BAB89361.1| calmodulin [Strongylocentrotus intermedius] | 2 | 7.1 | 17.361 | 155 | 13.917 | 4.88E+08 |
| 15 | Unigene64543_mantle 266 889 GTP-binding nuclear protein Ran [Crassostrea gigas] | 2 | 11.1 | 23.773 | 208 | 13.133 | 5.18E+07 |
| 16 | Unigene44357_mantle 34 480 ribosomal protein S15 [Ostrea edulis] | 2 | 8.7 | 17.214 | 149 | 12.625 | 9.90E+08 |
| 17 | CL28.Contig6_mantle 97 1446 alpha tubulin [Schistosoma mansoni] >gi|161072|gb|AAA29918.1| alpha tubulin [Schistosoma mansoni] >gi|56758676|gb|AAW27478.1| SJCHGC00301 protein [Schistosoma japonicum];CL28.Contig10_mantle 114 1463 alpha tubulin [Schisto | 1 | 13.6 | 49.979 | 450 | 44.117 | 2.31E+09 |
| 18 | Unigene25308_mantle 71 889 PREDICTED: Pros45-like [Saccoglossus kowalevskii] | 1 | 4.8 | 30.707 | 273 | 28.654 | 8.00E+07 |
| 19 | Unigene12030_mantle 99 1049 minus strand Receptor of Activated Kinase C 1 [Mya arenaria] | 1 | 8.5 | 35.016 | 317 | 27.923 | 4.02E+08 |
| 20 | CL28.Contig5_mantle 2 997 minus strand Tubulin alpha-3 chain [Crassostrea gigas] | 1 | 19.6 | 37.058 | 332 | 25.303 | 0.00E+00 |
| 21 | Unigene25291_mantle 57 575 minus strand extracellular copper-zinc superoxide dismutase [Portunus trituberculatus] | 1 | 5.2 | 18.615 | 173 | 18.287 | 7.83E+07 |
| 22 | Unigene21650_mantle 76 450 insoluble matrix protein [Pinctada fucata] | 1 | 16 | 9.9987 | 125 | 18.176 | 4.67E+07 |
| 23 | CL4779.Contig2_mantle 34 1890 PREDICTED: PHD finger protein 3-like [Saccoglossus kowalevskii];CL4779.Contig1_mantle 34 2988 PREDICTED: PHD finger protein 3-like [Saccoglossus kowalevskii] | 1 | 1 | 70.31 | 619 | 14.865 | 0.00E+00 |
| 24 | CL7681.Contig1_mantle 150 917 hypothetical protein CGI_10014201 [Crassostrea gigas] | 1 | 2.7 | 29.756 | 256 | 14.678 | 0.00E+00 |
| 25 | CL7889.Contig1_mantle 75 1379 minus strand hypothetical protein CAPTEDRAFT_127356 [Capitella teleta];CL7889.Contig2_mantle 62 1375 minus strand hypothetical protein CAPTEDRAFT_127356 [Capitella teleta] | 1 | 4.1 | 46.921 | 435 | 12.59 | 4.68E+07 |
| 26 | CL6571.Contig2_mantle 25 615 ribosomal protein L19 [Crassostrea gigas] | 1 | 8.6 | 23.268 | 197 | 12.332 | 6.29E+07 |
| 27 | Unigene11999_mantle 35 235 40S ribosomal protein S28 [Crassostrea gigas] | 1 | 16.4 | 7.6197 | 67 | 11.746 | 4.48E+08 |
| 28 | Unigene50371_mantle 106 621 minus strand hypothetical protein DDB_G0274007 [Dictyostelium discoideum AX4] >gi|66823395|ref|XP_645052.1| hypothetical protein DDB_G0272797 [Dictyostelium discoideum AX4] >gi|122057631|sp|Q556J6.1|Y4007_DICDI RecName: Full | 1 | 5.8 | 19.817 | 172 | 11.541 | 8.73E+07 |
| 29 | Unigene62090_mantle 101 484 PREDICTED: group 10 secretory phospholipase A2 [Saimiri boliviensis boliviensis] | 1 | 10.9 | 14.536 | 128 | 11.43 | 2.20E+08 |
| 30 | Unigene69724_mantle 22 477 40S ribosomal protein S14 [Crassostrea gigas] | 1 | 8.6 | 16.32 | 152 | 11.001 | 1.17E+08 |
| 31 | CL123.Contig2_mantle 48 848 minus strand hypothetical protein CGI_10023735 [Crassostrea gigas] | 1 | 2.2 | 30.96 | 267 | 10.599 | 0.00E+00 |
| 32 | Unigene68329_mantle 238 1176 minus strand catchin protein [Mytilus galloprovincialis];Unigene68330_mantle 2630 3634 minus strand myosin heavy chain [Mytilus galloprovincialis] | 1 | 3.8 | 34.791 | 313 | 10.136 | 7.09E+07 |
| 33 | Unigene64088_mantle 2 574 minus strand glucose-regulated protein 78 [Bombyx mori] | 1 | 8.9 | 20.96 | 191 | 9.8509 | 6.74E+07 |
| 34 | CL1052.Contig9_mantle 361 1308 Poly(rC)-binding protein 3 [Crassostrea gigas];CL1052.Contig11_mantle 263 1210 Poly(rC)-binding protein 3 [Crassostrea gigas];CL1052.Contig7_mantle 263 1237 Poly(rC)-binding protein 3 [Crassostrea gigas];CL1052.Conti | 1 | 4.4 | 33.816 | 316 | 8.9452 | 6.22E+07 |
| 35 | Unigene69779_mantle 5 289 fibroin [Antheraea yamamai] | 1 | 22.1 | 7.4838 | 95 | 8.2794 | 7.45E+08 |
| 36 | Unigene69817_mantle 16 1209 hypothetical protein CAPTEDRAFT_155818 [Capitella teleta];Unigene69725_mantle 75 1325 eukaryotic initiation factor 4a [Tribolium castaneum] | 1 | 4 | 45.62 | 398 | 8.0064 | 1.79E+08 |
| 37 | Unigene42602_mantle 20 736 minus strand Rpls3-b protein [Xenopus laevis] >gi|213626632|gb|AAI69756.1| Rpls3-b protein [Xenopus laevis] >gi|213627669|gb|AAI69758.1| Rpls3-b protein [Xenopus laevis] | 1 | 5.4 | 26.426 | 239 | 7.7017 | 1.21E+08 |
| 38 | CL6608.Contig1_mantle 84 341 minus strand GNAS complex locus, isoform CRA_c [Homo sapiens] >gi|119595876|gb|EAW75470.1| GNAS complex locus, isoform CRA_c [Homo sapiens] | 1 | 14 | 9.5087 | 86 | 7.3391 | 1.60E+08 |
| 39 | CL8938.Contig6_mantle 2 868 minus strand Actin-2 [Crassostrea gigas];CL8938.Contig5_mantle 2 868 | 1 | 18.4 | 41.87 | 376 | 7.2915 | 1.49E+09 |
| 40 | CL4880.Contig2_mantle 54 725 minus strand IgGFc-binding protein [Crassostrea gigas];CL4880.Contig3_mantle 1425 2144 minus strand PREDICTED: zonadhesin [Gallus gallus] | 1 | 2.7 | 25.79 | 224 | 7.2261 | 2.88E+08 |
| 41 | Unigene69852_mantle 233 874 minus strand hypothetical protein CAPTEDRAFT_226009 [Capitella teleta] | 1 | 5.1 | 23.921 | 214 | 7.1261 | 5.54E+07 |
| 42 | Unigene8073_mantle 486 614 PREDICTED: collagen alpha-1(XI) chain-like, partial [Tursiops truncatus] | 1 | 25.6 | 3.8513 | 43 | 7.0962 | 1.10E+08 |
| 43 | CL482.Contig2_mantle 42 278 minus strand predicted protein [Nematostella vectensis] >gi|156217345|gb|EDO38264.1| predicted protein [Nematostella vectensis] | 1 | 12.7 | 9.1699 | 79 | 7.0681 | 0.00E+00 |
| 44 | Unigene62488_mantle 62 955 minus strand hypothetical protein CAPTEDRAFT_167479 [Capitella teleta] | 1 | 3 | 33.423 | 298 | 6.845 | 9.81E+07 |
| 45 | Unigene28639_mantle 88 300 minus strand hypothetical protein CAPTEDRAFT_6646 [Capitella teleta];Unigene53168_mantle 59 583 Ras-related protein Rab-33B [Crassostrea gigas];CL3065.Contig1_mantle 135 716 Ras-related protein Rab-6B [Crassostrea gigas | 1 | 15.5 | 8.0011 | 71 | 6.839 | 3.14E+07 |
| 46 | CL1874.Contig5_mantle 231 2165 minus strand Polyadenylate-binding protein 4 [Crassostrea gigas] | 1 | 2.6 | 71.394 | 645 | 6.8279 | 7.25E+07 |
| 47 | Unigene69137_mantle 2 751 minus strand heat shock protein 70 [Mytilus galloprovincialis];CL8076.Contig1_mantle 2 1615 minus strand heat shock protein 70 [Mytilus galloprovincialis];CL8076.Contig2_mantle 2 1627 minus strand heat shock protein 70 | 1 | 12.8 | 27.4 | 250 | 6.7601 | 8.38E+08 |
| 48 | CL1129.Contig1_mantle 35 1057 malate dehydrogenase precursor [Nucella lapillus] | 1 | 3.2 | 35.922 | 341 | 6.6516 | 5.12E+07 |
| 49 | Unigene77541_mantle 1 336 hypothetical protein CGI_10027441 [Crassostrea gigas] | 1 | 8.9 | 13.026 | 112 | 6.6408 | 3.57E+07 |
| 50 | Unigene29832_mantle 20 793 minus strand Protein SET [Crassostrea gigas] | 1 | 4.3 | 29.624 | 258 | 6.5608 | 1.56E+08 |
| 51 | CL3306.Contig1_mantle 56 562 Myosin regulatory light chain sqh [Crassostrea gigas];Unigene12561_mantle 63 605 minus strand Putative myosin regulatory light chain [Crassostrea gigas] | 1 | 5.9 | 19.464 | 169 | 6.3084 | 1.16E+08 |
| 52 | CL2008.Contig1_mantle 133 1221 minus strand Fructose-bisphosphate aldolase [Crassostrea gigas] | 1 | 3.9 | 39.202 | 363 | 6.2969 | 1.87E+08 |
| 53 | Unigene69727_mantle 2 205 minus strand RecName: Full=Alanine and glycine-rich protein; AltName: Full=MSI60-like protein | 1 | 16.2 | 5.9279 | 68 | 6.2834 | 1.96E+09 |
| 54 | CL2027.Contig1_mantle 81 830 minus strand Tudor domain-containing protein 1 [Crassostrea gigas] | 1 | 6.8 | 27.685 | 250 | 6.2743 | 5.91E+07 |
| 55 | Unigene24726_mantle 136 519 minus strand Mytilin-1 (Fragment) OS=Mytilus galloprovincialis PE=1 SV=1 | 1 | 12.5 | 14.701 | 128 | 6.2701 | 4.29E+07 |
| 56 | Unigene44380_mantle 13 123 minus strand hypothetical protein CGI_10014552 [Crassostrea gigas] | 1 | 24.3 | 4.1607 | 37 | 6.2545 | 3.63E+08 |
| 57 | Unigene67645_mantle 4 2487 hypothetical protein CGI_10017178 [Crassostrea gigas] | 1 | 1.4 | 92.339 | 828 | 6.1987 | 7.39E+07 |
| 58 | CL1249.Contig3_mantle 201 1232 Transcriptional repressor p66-alpha [Crassostrea gigas] | 1 | 3.2 | 38.526 | 344 | 6.1556 | 9.81E+07 |
| 59 | Unigene67197_mantle 88 1059 hypothetical protein CGI_10014293 [Crassostrea gigas] | 1 | 4.3 | 38.23 | 324 | 6.1483 | 1.86E+08 |
| 60 | Unigene60464_mantle 43 507 eukaryotic translation initiation factor 5a-1 [Ictalurus punctatus] >gi|308322237|gb|ADO28256.1| eukaryotic translation initiation factor 5a-1 [Ictalurus furcatus] >gi|308324385|gb|ADO29327.1| eukaryotic translation initiation | 1 | 5.2 | 17.227 | 155 | 6.0859 | 5.87E+07 |
| 61 | CL8670.Contig1_mantle 52 432 minus strand histone variant H2A.Z [Mytilus galloprovincialis];Unigene60721_mantle 178 579 minus strand histone variant H2A.X [Mytilus galloprovincialis] | 1 | 7.1 | 13.409 | 127 | 6.0829 | 5.39E+08 |
| 62 | Unigene13528_mantle 1 945 D-3-phosphoglycerate dehydrogenase, partial [Crassostrea gigas] | 1 | 2.9 | 33.661 | 315 | 6.0758 | 4.72E+07 |
| 63 | Unigene45220_mantle 3 1397 hypothetical protein BRAFLDRAFT_118428 [Branchiostoma floridae] >gi|229299486|gb|EEN70105.1| hypothetical protein BRAFLDRAFT_118428 [Branchiostoma floridae] | 1 | 2.6 | 52.043 | 465 | 6.0619 | 0.00E+00 |
| 64 | CL594.Contig1_mantle 212 415 minus strand Ankyrin repeat domain-containing protein 29 [Crassostrea gigas];CL594.Contig2_mantle 212 424 minus strand Ankyrin repeat domain-containing protein 29 [Crassostrea gigas];CL594.Contig3_mantle 119 424 minu | 1 | 19.1 | 7.4283 | 68 | 5.992 | 1.13E+08 |
| 65 | CL2857.Contig2_mantle 147 719 hypothetical protein DAPPUDRAFT_98603 [Daphnia pulex];CL2857.Contig1_mantle 514 1086 hypothetical protein DAPPUDRAFT_98603 [Daphnia pulex] | 1 | 4.7 | 20.761 | 191 | 5.9562 | 1.75E+08 |
| 66 | CL1621.Contig1_mantle 65 1351 PREDICTED: probable histone-binding protein Caf1 isoform 2 [Nasonia vitripennis] | 1 | 2.1 | 48.286 | 429 | 5.9501 | 2.11E+08 |
| 67 | Unigene69898_mantle 136 1071 minus strand Serine/threonine-protein phosphatase 2A catalytic subunit beta isoform [Crassostrea gigas] | 1 | 2.6 | 35.875 | 312 | 5.9378 | 6.61E+07 |
| 68 | Unigene32768_mantle 23 817 minus strand 60S ribosomal protein L7a [Crassostrea gigas] | 1 | 4.2 | 30.383 | 265 | 5.9093 | 1.27E+08 |
| 69 | CL7021.Contig2_mantle 112 960 minus strand Cathepsin Z precursor [Salmo salar] | 1 | 4.9 | 31.514 | 283 | 5.9031 | 4.65E+07 |
| 70 | Unigene25247_mantle 471 2480 minus strand hypothetical protein CAPTEDRAFT_181527 [Capitella teleta] | 1 | 1.6 | 75.768 | 670 | 5.8873 | 1.04E+09 |
| 71 | CL7070.Contig1_mantle 84 1310 minus strand unnamed protein product [Tetraodon nigroviridis];CL7070.Contig2_mantle 84 1367 minus strand unnamed protein product [Tetraodon nigroviridis] | 1 | 2 | 45.421 | 409 | 5.8769 | 3.05E+07 |
| 72 | Unigene3473_mantle 2 397 minus strand cytochrome c oxidase subunit II [Rattus tanezumi] >gi|226453426|ref|YP_002791019.1| cytochrome c oxidase subunit II [Rattus rattus] >gi|317097176|ref|YP_004123314.1| cytochrome c oxidase subunit II [Rattus villosis | 1 | 5.3 | 14.91 | 132 | 5.8705 | 0.00E+00 |
| 73 | CL3081.Contig2_mantle 6 311 minus strand Uncharacterized protein PF11_0207 OS=Plasmodium falciparum (isolate 3D7) GN=PF11_0207 PE=4 SV=2 | 1 | 8.8 | 12.316 | 102 | 5.8622 | 1.54E+07 |
| 74 | Unigene45541_mantle 39 1076 Phosphate carrier protein, mitochondrial [Crassostrea gigas] | 1 | 3.5 | 38.675 | 346 | 5.8455 | 9.26E+07 |
| 75 | Unigene51504_mantle 73 1722 minus strand mitochondrial H+ ATPase a subunit [Pinctada fucata] | 1 | 1.8 | 59.493 | 550 | 5.8449 | 5.74E+07 |
| 76 | Unigene23877_mantle 103 624 minus strand hypothetical protein CAPTEDRAFT_177478 [Capitella teleta] | 1 | 8.6 | 20.613 | 174 | 5.8304 | 0.00E+00 |
| 77 | Unigene58234_mantle 3 662 minus strand Protein cereblon [Crassostrea gigas] | 1 | 4.5 | 25.417 | 220 | 5.7985 | 2.41E+07 |
| 78 | Unigene58497_mantle 169 534 minus strand hypothetical protein DAPPUDRAFT_302580 [Daphnia pulex] | 1 | 9 | 14.306 | 122 | 5.7966 | 1.78E+08 |
| 79 | Unigene69745_mantle 21 359 putative 60S ribosomal protein RPL34 [Phoronis muelleri] | 1 | 7.1 | 12.845 | 113 | 5.7926 | 3.86E+07 |
| 80 | CL2691.Contig2_mantle 1 600 minus strand AN1-type zinc finger protein 2B [Crassostrea gigas];CL2691.Contig1_mantle 1 606 minus strand AN1-type zinc finger protein 2B [Crassostrea gigas] | 1 | 4 | 22.328 | 200 | 5.7925 | 2.19E+07 |
| 81 | Unigene66132_mantle 152 1045 minus strand RecName: Full=Uncharacterized protein DDB_G0271670; Flags: Precursor | 1 | 2.7 | 31.635 | 298 | 5.7829 | 4.40E+08 |
| 82 | Unigene56028_mantle 104 1594 minus strand procollagen-proline dioxygenase beta subunit [Mytilus galloprovincialis] | 1 | 1.6 | 54.912 | 497 | 5.7796 | 0.00E+00 |
| 83 | Unigene41906_mantle 92 1336 minus strand Phosphoglycerate kinase 1 [Crassostrea gigas] | 1 | 3.6 | 43.705 | 415 | 5.7793 | 4.06E+07 |
| 84 | Unigene47691_mantle 141 1778 Iron/zinc purple acid phosphatase-like protein [Crassostrea gigas] | 1 | 2.2 | 61.316 | 546 | 5.7706 | 1.83E+08 |
| 85 | Unigene34805_mantle 60 1358 minus strand Adenosylhomocysteinase A [Crassostrea gigas] | 1 | 1.8 | 47.655 | 433 | 5.7678 | 4.43E+07 |
| 86 | Unigene2292_mantle 141 2237 minus strand Exostosin-2 [Crassostrea gigas] | 1 | 1.7 | 80.752 | 699 | 5.7674 | 1.12E+08 |
| 87 | Unigene69706_mantle 8 511 minus strand ribosomal protein L23a [Argopecten irradians] | 1 | 7.7 | 19.133 | 168 | 5.7605 | 8.40E+07 |
| 88 | Unigene55440_mantle 14 1276 Sodium/potassium-transporting ATPase subunit alpha [Crassostrea gigas] | 1 | 3.6 | 46.171 | 421 | 5.7559 | 4.10E+07 |
| 89 | Unigene57157_mantle 2 292 Prestin [Crassostrea gigas] | 1 | 16.5 | 10.864 | 97 | 5.7551 | 0.00E+00 |
| 90 | Unigene1305_mantle 188 3688 minus strand hypothetical protein CGI_10019531 [Crassostrea gigas];Unigene1304_mantle 23 3736 minus strand hypothetical protein CGI_10019531 [Crassostrea gigas] | 1 | 0.7 | 133.46 | 1167 | 5.7483 | 1.60E+08 |
| 91 | Unigene28083_mantle 29 418 minus strand putative 40S ribosomal protein RPS15A [Phoronis muelleri] | 1 | 6.2 | 14.787 | 130 | 5.7383 | 2.87E+07 |
| 92 | Unigene670_mantle 342 3068 Cell division cycle 2-related protein kinase 7 [Crassostrea gigas] | 1 | 1.8 | 105.59 | 909 | 5.7376 | 0.00E+00 |
| 93 | Unigene65125_mantle 68 1750 Tripartite motif-containing protein 56 [Crassostrea gigas] | 1 | 2.1 | 63.012 | 561 | 5.7344 | 1.01E+08 |
| 94 | Unigene45287_mantle 158 448 PREDICTED: 10 kDa heat shock protein, mitochondrial-like [Ornithorhynchus anatinus] | 1 | 10.3 | 10.867 | 97 | 5.7301 | 7.54E+07 |
| 95 | Unigene60065_mantle 2 1243 minus strand Zinc finger MYM-type protein 4 [Crassostrea gigas] | 1 | 1.9 | 46.304 | 414 | 5.7166 | 2.15E+08 |
| 96 | CL2117.Contig2_mantle 113 442 minus strand PREDICTED: putative porin-like [Saccoglossus kowalevskii] | 1 | 9.1 | 11.995 | 110 | 5.7056 | 2.65E+07 |
| 97 | Unigene40700_mantle 210 1232 Peritrophin-1 [Camponotus floridanus] | 1 | 0 | 35.432 | 341 | 5.702 | 4.04E+08 |
| 98 | Unigene35195_mantle 1 357 minus strand Histone-lysine N-methyltransferase MLL3 [Crassostrea gigas] | 1 | 5 | 12.394 | 119 | 5.6977 | 0.00E+00 |
| 99 | Unigene79417_mantle 1 213 BTB/POZ domain-containing protein 6 [Crassostrea gigas] | 1 | 15.5 | 7.8771 | 71 | 5.6975 | 0.00E+00 |
| 100 | Unigene59291_mantle 81 581 minus strand Integrator complex subunit 3 [Crassostrea gigas] | 1 | 9.6 | 18.995 | 167 | 5.6968 | 0.00E+00 |
| 101 | CL2345.Contig3_mantle 122 862 minus strand Coiled-coil domain-containing protein 9 [Crassostrea gigas];CL2345.Contig1_mantle 122 2881 minus strand Coiled-coil domain-containing protein 9 [Crassostrea gigas];CL2345.Contig2_mantle 122 2950 minus s | 1 | 5.7 | 28.775 | 247 | 5.696 | 3.62E+08 |
| 102 | CL4577.Contig5_mantle 363 6086 nonmuscle myosin II, partial [Aplysia californica] | 1 | 0.8 | 222.2 | 1908 | 5.6944 | 7.17E+07 |
| 103 | Unigene64182_mantle 2 592 minus strand hypothetical protein CGI_10011620 [Crassostrea gigas] | 1 | 6.6 | 21.318 | 197 | 5.6938 | 4.23E+07 |
| 104 | Unigene62678_mantle 160 1839 minus strand F-box/LRR-repeat protein 7 [Crassostrea gigas] | 1 | 1.2 | 63.182 | 560 | 5.6903 | 0.00E+00 |
| 105 | Unigene64461_mantle 264 1067 Prolow-density lipoprotein receptor-related protein 1 [Crassostrea gigas] | 1 | 3.7 | 30.337 | 268 | 5.6857 | 3.50E+08 |
| 106 | Unigene51647_mantle 100 1626 Presenilin-2 [Crassostrea gigas] | 1 | 2.8 | 57.529 | 509 | 5.6822 | 0.00E+00 |
