# Supplementary material
Source: publisher figshare collection journal article supplement (https://tandf.figshare.com/articles/dataset/_/12164274)

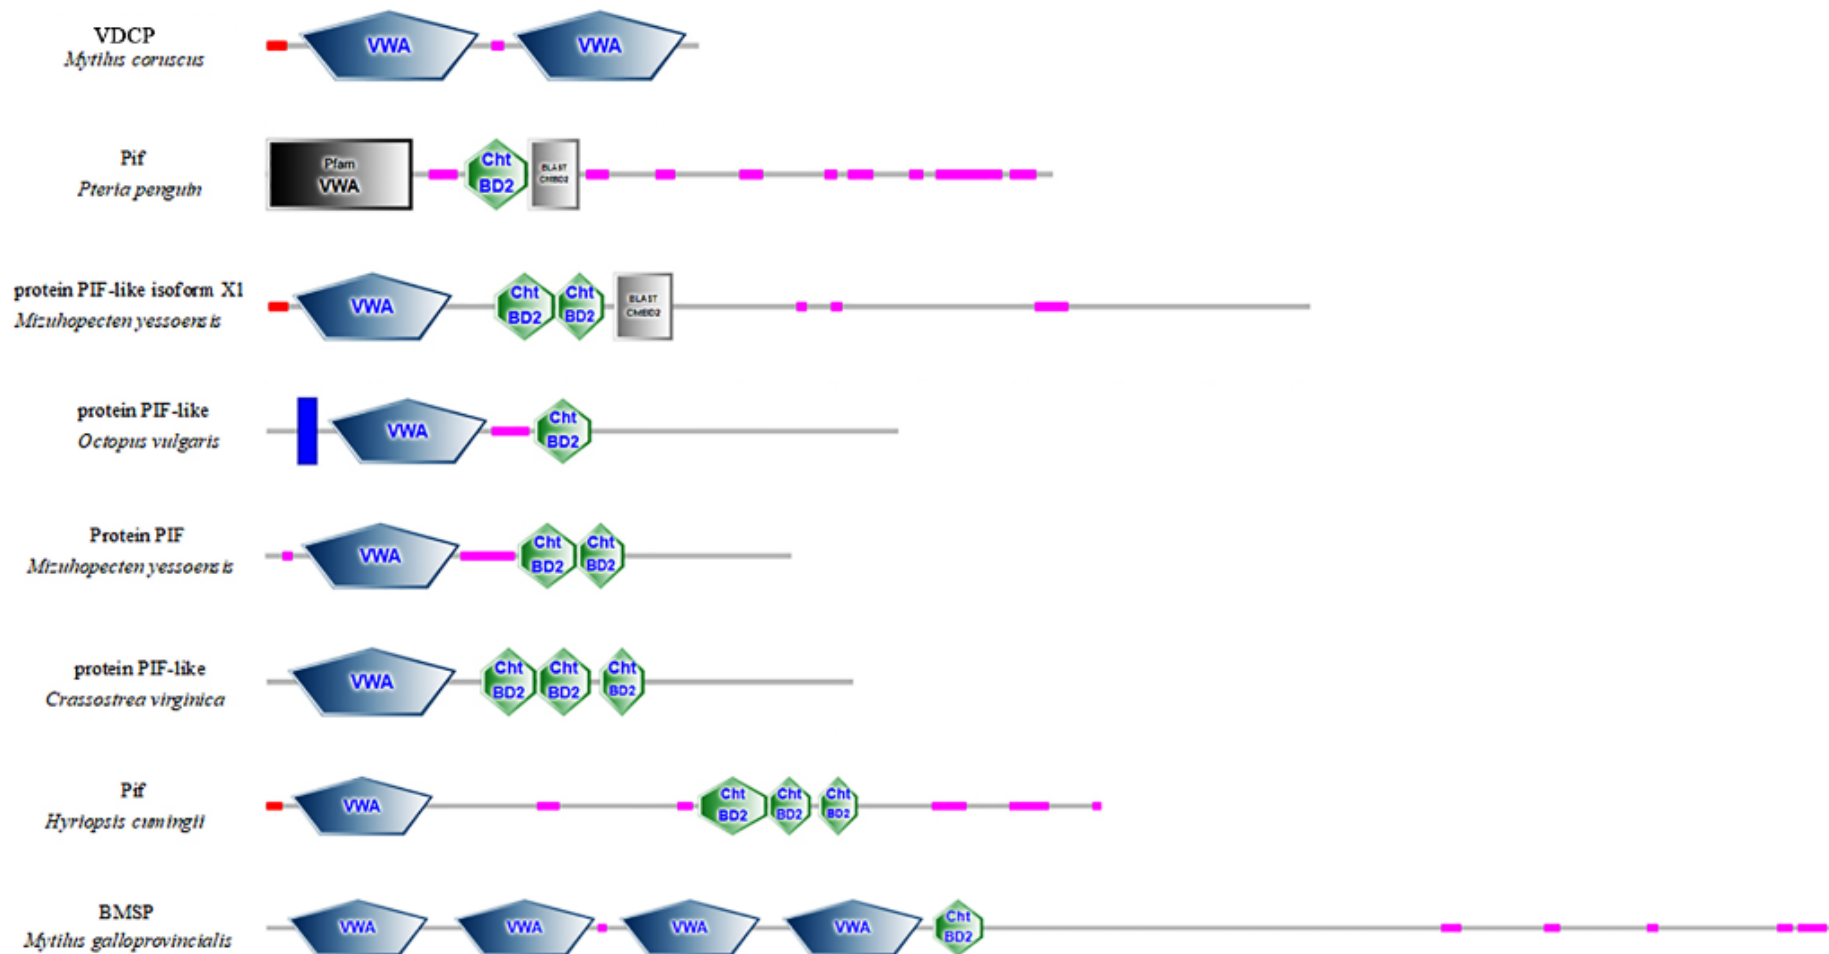

**Supplementary Figure 1: domain organization of VDCP and other vWA domain-containing SMPs.**

Supplement: Supplementary file 1 [file 1 › tbbb_a_1756735_sm1892.pdf]
